# Supplementary material
Source: HighWire-hosted journal article supplement (https://erj.ersjournals.com/content/60/6/2102356)

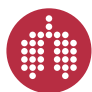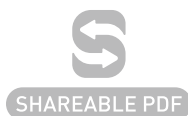

# Inhaled seralutinib exhibits potent efficacy in models of pulmonary arterial hypertension

Anna Galkin<sup>1,5</sup>, Ravikumar Sitapara<sup>1,2,5</sup>, Bryan Clemons<sup>1</sup>, Eduardo Garcia<sup>1</sup>, Michael Kennedy<sup>1</sup>, David Guimond<sup>1</sup>, Laura L. Carter<sup>1</sup>, Ashley Douthitt<sup>1</sup>, Robin Osterhout<sup>1</sup>, Aneta Gandjeva<sup>3</sup>, Deborah Slee<sup>1</sup>, Luisa Salter-Cid<sup>1</sup>, Rubin M. Tuder<sup>3</sup> and Lawrence S. Zisman<sup>1,4</sup>

<sup>1</sup>Gossamer Bio, Inc., San Diego, CA, USA. <sup>2</sup>The Rensselaer Center for Translational Research Inc., Rensselaer, NY, USA. <sup>3</sup>University of Colorado School of Medicine, Aurora, CO, USA. <sup>4</sup>Pulmokine Inc., Troy, NY, USA. <sup>5</sup>A. Galkin and R. Sitapara contributed equally as first authors.

Corresponding author: Lawrence S. Zisman (lzisman@gossamerbio.com)

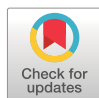

Shareable abstract (@ERSpublications)

**Seralutinib is an inhaled, small-molecule kinase inhibitor that targets PDGFR $\alpha$ / $\beta$ , CSF1R and c-KIT, and upregulates BMPR2 protein expression; these pathways play important roles in PAH. The efficacy of seralutinib is demonstrated in two animal models of PAH.** <https://bit.ly/3wObkEN>

**Cite this article as:** Galkin A, Sitapara R, Clemons B, *et al.* Inhaled seralutinib exhibits potent efficacy in models of pulmonary arterial hypertension. *Eur Respir J* 2022; 60: 2102356 [DOI: 10.1183/13993003.02356-2021].

This single-page version can be shared freely online.

Copyright ©The authors 2022.

This version is distributed under the terms of the Creative Commons Attribution Non-Commercial Licence 4.0. For commercial reproduction rights and permissions contact [permissions@ersnet.org](mailto:permissions@ersnet.org)

Received: 27 Aug 2021  
Accepted: 20 May 2022

## Abstract

**Background** Signalling through platelet-derived growth factor receptor (PDGFR), colony-stimulating factor 1 receptor (CSF1R) and mast/stem cell growth factor receptor kit (c-KIT) plays a critical role in pulmonary arterial hypertension (PAH). We examined the preclinical efficacy of inhaled seralutinib, a unique small-molecule PDGFR/CSF1R/c-KIT kinase inhibitor in clinical development for PAH, in comparison to a proof-of-concept kinase inhibitor, imatinib.

**Methods** Seralutinib and imatinib potency and selectivity were compared. Inhaled seralutinib pharmacokinetics/pharmacodynamics were studied in healthy rats. Efficacy was evaluated in two rat models of PAH: SU5416/Hypoxia (SU5416/H) and monocrotaline pneumonectomy (MCTPN). Effects on inflammatory/cytokine signalling were examined. PDGFR, CSF1R and c-KIT immunohistochemistry in rat and human PAH lung samples and microRNA (miRNA) analysis in the SU5416/H model were performed.

**Results** Seralutinib potently inhibited PDGFR $\alpha$ / $\beta$ , CSF1R and c-KIT. Inhaled seralutinib demonstrated dose-dependent inhibition of lung PDGFR and c-KIT signalling and increased bone morphogenetic protein receptor type 2 (BMPR2). Seralutinib improved cardiopulmonary haemodynamic parameters and reduced small pulmonary artery muscularisation and right ventricle hypertrophy in both models. In the SU5416/H model, seralutinib improved cardiopulmonary haemodynamic parameters, restored lung BMPR2 protein levels and decreased N-terminal pro-brain natriuretic peptide (NT-proBNP), more than imatinib. Quantitative immunohistochemistry in human lung PAH samples demonstrated increased PDGFR, CSF1R and c-KIT. miRNA analysis revealed candidates that could mediate seralutinib effects on BMPR2.

**Conclusions** Inhaled seralutinib was an effective treatment of severe PAH in two animal models, with improved cardiopulmonary haemodynamic parameters, a reduction in NT-proBNP, reverse remodelling of pulmonary vascular pathology and improvement in inflammatory biomarkers. Seralutinib showed greater efficacy compared to imatinib in a preclinical study.

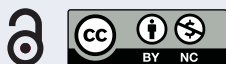

Supplement: inline-supplementary-material-5 [file inline-supplementary-material-5.pdf]
